# Supplementary material for: The nonessentiality of essential genes in yeast provides therapeutic insights into a human disease
Source: HighWire-hosted journal article supplement (doi:10.1101/gr.205955.116), 2016-07-20
Supplement: Supplemental_Table_S1.xlsx [file Supplemental_Table_S1.xlsx]

## Sheet: Table S1
Table S1 The 280 S. cerevisiae strains used in this study
Mutated ORF	Mutated gene	Parental strain
YOL005C	RPB11	R1158
YDL007W	RPT2	R1158
YMR235C	RNA1	R1158
YOR204W	DED1	R1158
YKL052C	ASK1	R1158
YOL139C	CDC33	R1158
YNR035C	ARC35	R1158
YKL210w	UBA1	R1158
YBR029C	CDS1	R1158
YBR196C	PGI1	R1158
YHR122W	YHR122W	R1158
YML130C	ERO1	R1158
YNL222W	SSU72	R1158
YDL166C	FAP7	R1158
YBL020W	RFT1	R1158
YBL084C	CDC27	R1158
YLR359W	ADE13	R1158
YAL038W	CDC19	R1158
YBR234C	ARC40	R1158
YFL005W	SEC4	R1158
YJL097W	YJL097W	R1158
YBL050W	SEC17	R1158
YBR088C	POL30	R1158
YOR116C	RPO31	R1158
YML046W	PRP39	R1158
YDL145C	COP1	R1158
YIR022W	SEC11	R1158
YHR090C	YNG2	R1158
YNL102W	POL1	R1158
YPR105C	COG4	R1158
YBR234C	ARC40	R1158
YBL040C	ERD2	R1158
YFL005W	SEC4	R1158
YEL034W	YEL034W	R1158
YGL065C	ALG2	R1158
YPR016C	YPR016C	R1158
YDL055C	PSA1	R1158
YBR254C	TRS20	R1158
YGR158C	MTR3	R1158
YDL055C	PSA1	R1158
YAL003W	EFB1	R1158
YOR210W	RPB10	R1158
YFL024C	EPL1	R1158
YOR159C	SME1	R1158
YKL099C	UTP11	R1158
YCR035C	RRP43	R1158
YPL243W	SRP68	R1158
YKL186C	MTR2	R1158
YHR197W	IPI2	R1158
YPR144C	UTP19	R1158
YPL190C	NAB3	R1158
YBR080C	SEC18	R1158
YPL093W	NOG1	R1158
YIL078w	THS1	R1158
YHR197W	IPI2	R1158
YBR143C	SUP45	R1158
YPR178W	PRP4	R1158
YBL076C	ILS1	R1158
YLL035W	GRC3	R1158
YIR012W	SQT1	R1158
YDL140C	RPO21	R1158
YAR008W	SEN34	R1158
YMR290C	HAS1	R1158
YER146W	LSM5	R1158
YLL035W	GRC3	R1158
YNR053C	NOG2	R1158
YIL003W	DRE3	R1158
YBR079C	RPG1	R1158
YLR029C	RPL15A	R1158
YDL031W	DBP10	R1158
YBR253W	SRB6	R1158
YCR013C	YCR013C	R1158
YBR253W	SRB6	R1158
YDL092W	SRP14	R1158
YDL195W	SEC31	R1158
YER172C	BRR2	R1158
YBR253W	SRB6	R1158
YJR076C	CDC11	R1158
YCR013C	YCR013C	R1158
YJR007W	SUI2	R1158
YDR060W	MAK21	R1158
YKL122C	SRP21	R1158
YOR122C	PFY1	R1158
YOR261C	RPN8	R1158
YOR151C	RPB2	R1158
YPL242C	IQG1	R1158
YOR168W	GLN4	R1158
YNL310C	YNL310C	R1158
YNL131W	TOM22	R1158
YNL149C	YNL149C	R1158
YNL310C	YNL310C	R1158
YNL158W	YNL158W	R1158
YDR189W	SLY1	R1158
YER008C	SEC3	R1158
YDR373W	FRQ1	R1158
YPL231W	FAS2	R1158
YOR254C	SEC63	R1158
YPL010W	RET3	R1158
YBR257W	POP4	R1158
YAL025C	MAK16	R1158
YOR335C	ALA1	R1158
YBR257W	POP4	R1158
YGL207W	SPT16	R1158
YDL150W	RPC53	R1158
YDR045C	RPC11	R1158
YPL228W	CET1	R1158
YKL035W	UGP1	R1158
YDR047W	HEM12	R1158
YDR201W	SPC19	R1158
YPR033C	HTS1	R1158
YDR054C	CDC34	R1158
YER023W	PRO3	R1158
YDR398W	UTP5	R1158
YNL282W	POP3	R1158
YGR267C	FOL2	R1158
YER171W	RAD3	R1158
YDR091C	RLI1	R1158
YKR086W	PRP16	R1158
YNL163C	RIA1	R1158
YGR274C	TAF1	R1158
YNL216W	RAP1	R1158
YLL003W	SFI1	R1158
YKR025W	RPC37	R1158
YLR008C	YLR008C	R1158
YPL218W	SAR1	R1158
YLR147C	SMD3	R1158
YML031W	NDC1	R1158
YPR034W	ARP7	R1158
YOL120C	RPL18A	R1158
YLR459W	CDC91	R1158
YGR030C	POP6	R1158
YLR163C	MAS1	R1158
YKR037C	SPC34	R1158
YKR086W	PRP16	R1158
YML015C	TAF11	R1158
YMR005W	TAF4	R1158
YHR058C	MED6	R1158
YLL050C	COF1	R1158
YMR200W	ROT1	R1158
YGL233W	SEC15	R1158
YLR291C	GCD7	R1158
YPR183W	DPM1	R1158
YFL018W-A	LPD1	R1158
YGR060W	ERG25	R1158
YGL048C	RPT6	R1158
YDR167W	TAF10	R1158
YFR004W	RPN11	R1158
YDR464W	SPP41	R1158
YFR004W	RPN11	R1158
YDR498C	SEC20	R1158
YER003C	PMI40	R1158
YGL061C	DUO1	R1158
YHR019C	DED81	R1158
YHR005C	GPA1	R1158
YGL106W	MLC1	R1158
YHR069C	RRP4	R1158
YLR305C	STT4	R1158
YDR145W	TAF12	R1158
YIL026C	IRR1	R1158
YOL021C	DIS3	R1158
YOR370C	MRS6	R1158
YER022W	SRB4	R1158
YDR037W	KRS1	R1158
YOL142W	RRP40	R1158
YMR208W	ERG12	R1158
YHR164C	DNA2	R1158
YDR211W	STN1	R1158
YDR341C	YDR341C	R1158
YPL124W	NIP29	R1158
YIL048W	NEO1	R1158
YDR460W	TFB3	R1158
YDR454C	GUK1	R1158
YDR232W	HEM1	R1158
YMR208W	ERG12	R1158
YIL115C	NUP159	R1158
YEL002C	WBP1	R1158
YEL058W	PCM1	R1158
YDR238C	SEC26	R1158
YLR277C	YSH1	R1158
YER043C	SAH1	R1158
YHR083W	YHR083W	R1158
YGL238W	CSE1	R1158
YPL252C	YAH1	R1158
YJL069C	UTP18	R1158
YHR107C	CDC12	R1158
YGL145W	TIP20	R1158
YGL137W	SEC27	R1158
YIL004C	BET1	R1158
YDL147W	RPN5	R1158
YDR299W	BFR2	R1158
YKL172W	EBP2	R1158
YDR429C	TIF35	R1158
YDR023W	SES1	R1158
YLR009W	RLP24	R1158
YDR188W	CCT6	R1158
YER082C	UTP7	R1158
YLR153C	ACS2	R1158
YPL217C	BMS1	R1158
YBR153W	RIB7	R1158
YBL030C	PET9	R1158
YNL026W	SAM50	R1158
YGR074W	SMD1	R1158
YER165W	PAB1	R1158
YLR208W	SEC13	R1158
YGL112C	TAF6	R1158
YNL287W	SEC21	R1158
YBR202W	CDC47	R1158
YGL092W	NUP145	R1158
YLR212c	TUB4	R1158
YGL001C	ERG26	R1158
YNL244C	SUI1	R1158
YOL097C	WRS1	R1158
YDL029W	ARP2	R1158
YIL126W	STH1	R1158
YLR276C	DBP9	R1158
YDR301W	CFT1	R1158
YPL169C	MEX67	R1158
YOR048C	RAT1	R1158
YDL126c	CDC48	R1158
YJL050W	MTR4	R1158
YMR117C	SPC24	R1158
YFR051C	RET2	R1158
YDR339C	YDR339C	R1158
YOR272W	YTM1	R1158
YDR087C	RRP1	R1158
YKL045W	PRI2	R1158
YMR146C	TIF34	R1158
YFL045C	SEC53	R1158
YDR050C	TPI1	R1158
YGL103W	RPL28	R1158
YPL235W	RVB2	R1158
YDR280W	RRP45	R1158
YKL144C	RPC25	R1158
YNL207W	RIO2	R1158
YFL017C	GNA1	R1158
YBR247C	ENP1	R1158
YMR203W	TOM40	R1158
YFL038C	YPT1	R1158
YNL039W	TFC5	R1158
YPL266W	DIM1	R1158
YMR296C	LCB1	R1158
YML093W	UTP14	R1158
YNL132W	KRE33	R1158
YFR028c	CDC14	R1158
YFR002W	NIC96	R1158
YLR141W	RRN5	R1158
YNL007C	SIS1	R1158
YPL266W	DIM1	R1158
YGL120C	PRP43	R1158
YER029C	SMB1	R1158
YJL156C	SSY5	R1158
YJR123W	RPS5	R1158
YGR083C	GCD2	R1158
YOR257W	CDC31	R1158
YOR207C	RET1	R1158
YFR050C	PRE4	R1158
YJR093C	FIP1	R1158
YKL012W	PRP40	R1158
YLR129W	DIP2	R1158
YJR046W	YJR046W	R1158
YGR185C	TYS1	R1158
YLL036C	PRP19	R1158
YKL024C	URA6	R1158
YHR170W	NMD3	R1158
YJL002C	OST1	R1158
YGR218W	CRM1	R1158
YOR341W	RPA190	R1158
YLR397C	AFG2	R1158
YNL267w	PIK1	R1158
YMR260C	TIF11	R1158
YIL109C	SEC24	R1158
YCL054W	SPB1	R1158
YOL149W	DCP1	R1158
YFL009W	CDC4	R1158
YNL113W	RPC19	R1158
YGL008C	PMA1	R1158
YHR020W	YHR020W	R1158
YCR052W	RSC6	R1158
YOR194C	TOA1	R1158
YLR397C	AFG2	R1158
