# Supplementary material for: The nonessentiality of essential genes in yeast provides therapeutic insights into a human disease
Source: HighWire-hosted journal article supplement (doi:10.1101/gr.205955.116), 2016-07-20
Supplement: Supplemental_Table_S2.xlsx [file Supplemental_Table_S2.xlsx]

## Sheet: Table S2
Table S2. Mutations identified in mutants
Essential gene	Rescuing gene	Chr	Pos	Ref	Alt	Amino acid change	Mutation type
ADE13	ADE6	chrVII	615668	AAT	A		indel
		chrVII	612362	CG	C		indel
		chrVII	615212	C	A	E→*	nonsense
		chrVII	615178	C	T	W→*	nonsense
		chrVII	614909	C	A	E→*	nonsense
		chrVII	614867	T	A	K→*	nonsense
		chrVII	614582	G	A	Q→*	nonsense
		chrVII	614483	A	G	S→P	missense
		chrVII	613759	C	A	G→V	missense
		chrVII	613246	A	C	L→W	missense
	ADE5,7	chrVII	58857	TTG	T		indel
		chrVII	57779	AG	A		indel
		chrVII	56669	C	A	S→*	nonsense
		chrVII	56612	C	A	S→*	nonsense
		chrVII	58382	C	T	S→F	missense
		chrVII	58207	G	C	G→R	missense
		chrVII	57686	C	A	S→Y	missense
		chrVII	56800	G	A	E→K	missense
	ADE4	chrXIII	865893	GC	G		indel
		chrXIII	866324	A	C	Y→*	nonsense
		chrXIII	866136	C	T	C→Y	missense
		chrXIII	865957	C	T	G→S	missense
		chrXIII	865882	G	A	P→S	missense
	BAS1	chrXI	636199	G	T	G→C	missense
		chrXI	636047	G	A	G→E	missense
		chrXI	635955	G	C	R→S	missense
	PHO2	chrIV	271542	GT	G		indel
		chrIV	271586	C	A	E→*	nonsense
Essential gene	Rescuing gene	Chr	Pos	Ref	Alt	Amino acid change	mutation type
ERD2	ERV29	chrVII	1061516	AC	A		indel
		chrVII	1061214	GC	G		indel
		chrVII	1060958	TA	T		indel
		chrVII	1060757	AT	A		indel
		chrVII	1061512	G	A	Q→*	nonsense
		chrVII	1061370	G	C	S→*	nonsense
		chrVII	1061342	A	C	Y→*	nonsense
		chrVII	1061341	C	A	E→*	nonsense
		chrVII	1061283	C	T	W→*	nonsense
		chrVII	1061273	G	C	Y→*	nonsense
		chrVII	1061112	G	T	S→*	nonsense
		chrVII	1061055	G	C	S→*	nonsense
		chrVII	1060865	G	C	Y→*	nonsense
		chrVII	1060817	G	C	Y→*	nonsense
	SEC23	chrXVI	899522	G	T	A→D	missense
		chrXVI	898899	T	C	R→G	missense
		chrXVI	898898	C	G	R→T	missense
		chrXVI	898897	C	A	R→S	missense
		chrXVI	897868	G	T	N→K	missense
		chrXVI	897426	C	G	D→H	missense
	SAR1	chrXVI	139384	T	C	F→S	missense
		chrXVI	139015	A	C	E→A	missense
		chrXVI	138958	A	G	H→R	missense
Essential gene	Rescuing gene	Chr	Pos	Ref	Alt	Amino acid change	mutation type
MIM1	SIT4	chrIV	370420	T	G	F→C	missense
		chrIV	370273	C	A	S→Y	missense
		chrIV	370155	G	A	E→K	missense
		chrIV	370143	G	T	G→W	missense
		chrIV	370042	T	G	L→R	missense
		chrIV	370039	G	A	S→N	missense
Essential gene	Rescuing gene	Chr	Pos	Ref	Alt	Amino acid change	mutation type
SEC14	KES1	chrXVI	279321	CT	C		indel
		chrXVI	279260	AC	A		indel
		chrXVI	278886	AC	A		indel
		chrXVI	279697	C	T	ATG→I	nonsense
		chrXVI	279331	C	T	W→*	nonsense
		chrXVI	278630	C	T	W→*	nonsense
		chrXVI	279633	C	A	D→Y	missense
		chrXVI	279587	G	A	S→L	missense
		chrXVI	279452	A	G	L→P	missense
		chrXVI	279354	C	A	G→C	missense
		chrXVI	279353	C	A	G→V	missense
		chrXVI	279254	G	T	A→D	missense
	PCT1	chrVII	904668	A	AT		indel
		chrVII	903717	CT	C		indel
		chrVII	904435	C	A	R→W	missense
		chrVII	904420	C	T	G→D	missense
		chrVII	904403	G	A	H→Y	missense
		chrVII	904340	C	A	V→F	missense
		chrVII	904243	A	T	V→D	missense
		chrVII	904216	C	G	W→S	missense
		chrVII	904177	T	C	D→G	missense
		chrVII	904174	T	G	Y→S	missense
		chrVII	904124	A	C	Y→D	missense
		chrVII	904008	G	C	N→K	missense
	CKI1	chrXII	410111	AC	A		indel
		chrXII	409237	C	T	Q→*	nonsense
		chrXII	409423	T	C	C→R	missense
Essential gene	Rescuing gene	Chr	Pos	Ref	Alt	Amino acid change	mutation type
RER2	UME6	chrIV	866873	AT	A		indel
		chrIV	866808	CG	C		indel
		chrIV	865014	AT	A		indel
		chrIV	865013	TA	T		indel
		chrIV	865337	G	C	S→*	nonsense
		chrIV	865143	A	C	L→V	missense
		chrIV	865109	G	C	P→R	missense
		chrIV	865109	G	T	P→Q	missense
	SIN3	chrXV	320472	AC	A		indel
		chrXV	319633	AG	A		indel
		chrXV	319652	G	A	W→*	nonsense
		chrXV	319647	G	T	E→*	nonsense
		chrXV	319628	G	T	R-S	missense
	RPD3	chrXIV	18474	AC	A		indel
		chrXIV	18761	A	G	L-P	missense
	SDS3	chrIX	203208	T	A	R→*	nonsense
		chrIX	203118	G	A	Q→*	nonsense
